# Supplementary material for: Chromosome Y loss and drivers of clonal hematopoiesis in myelodysplastic syndrome
Source: PubMed Central journal article supplement — Haematologica. 2021 Feb 1;106(2):329–31. doi: 10.3324/haematol.2020.266601 (PMC7849334; doi:10.3324/haematol.2020.266601), 2021-02-01
Supplement: 2020_266601-Disclosures_Contributions.pdf [file 2020_266601-Disclosures_Contributions.pdf]

Haematologica  
HAEMATOL/2020/266601  
Version 1

Chromosome Y loss and drivers of clonal hematopoiesis in MDS

Panagiotis Baliakas and Lars Forsberg

Disclosures: L.A.F. is cofounder and shareholder in Cray Innovation AB.

Contributions: R.B. and L.A.F. wrote the manuscript.
